# Supplementary material for: Predictors of Sustained Response With Tofacitinib Therapy in Patients With Ulcerative Colitis
Source: PubMed Central journal article supplement (PMC9434448; doi:10.1093/ibd/izab278), 2021-12-27
Supplement: izab278_suppl_supplementary_material.pdf [file izab278_suppl_supplementary_material.pdf]

## SUPPLEMENTARY DATA

|                                                                                                                                                                                                                                                                                  |    |
|----------------------------------------------------------------------------------------------------------------------------------------------------------------------------------------------------------------------------------------------------------------------------------|----|
| Concomitant Medications.....                                                                                                                                                                                                                                                     | 3  |
| Logistic Regression Analysis .....                                                                                                                                                                                                                                               | 3  |
| SUPPLEMENTARY TABLE 1. Univariate Logistic Regression Analysis For Factors<br>Associated With Remission at Week 52 of OCTAVE Sustain Among All Patients With Non-<br>Missing Efficacy Values in OCTAVE Sustain.....                                                              | 5  |
| SUPPLEMENTARY TABLE 2. Univariate Logistic Regression Analysis For Factors<br>Associated With Remission at Week 52 of OCTAVE Sustain Among All Patients With Non-<br>Missing Efficacy Values Who Received Tofacitinib 5 mg BID in OCTAVE Sustain.....                            | 7  |
| SUPPLEMENTARY TABLE 3. Univariate Logistic Regression Analysis For Factors<br>Associated With Remission at Week 52 of OCTAVE Sustain Among All Patients With Non-<br>Missing Efficacy Values Who Received Tofacitinib 10 mg BID in OCTAVE Sustain.....                           | 8  |
| SUPPLEMENTARY TABLE 4. Univariate Cox Proportional Hazards Regression Analysis<br>For Factors Associated With Time to Loss of Response During OCTAVE Sustain Among All<br>Patients With Non-Missing Efficacy Values in OCTAVE Sustain.....                                       | 10 |
| SUPPLEMENTARY TABLE 5. Univariate Cox Proportional Hazards Regression Analysis<br>For Factors Associated With Time to Loss of Response During OCTAVE Sustain Among All<br>Patients With Non-Missing Efficacy Values Who Received Tofacitinib 5 mg BID in<br>OCTAVE Sustain.....  | 12 |
| SUPPLEMENTARY TABLE 6. Univariate Cox Proportional Hazards Regression Analysis<br>For Factors Associated With Time to Loss of Response During OCTAVE Sustain Among All<br>Patients With Non-Missing Efficacy Values Who Received Tofacitinib 10 mg BID in<br>OCTAVE Sustain..... | 14 |

SUPPLEMENTARY TABLE 7. Summary of Safety, AEs of Special Interest, and Laboratory Value Changes, By Week 52 Remission Status and Treatment Group ..... 16

## **Concomitant Medications**

Oral corticosteroids (prednisone-equivalent up to 25 mg/day or budesonide up to 9 mg/day) were permitted during the induction studies, provided that the dose remained stable for at least 2 weeks prior to baseline and throughout the induction study period. Corticosteroid tapering was mandatory at the beginning of OCTAVE Sustain. Prohibited concomitant therapies during OCTAVE Sustain included tumor necrosis factor inhibitors (TNFi) and immunomodulators.

## **Logistic Regression Analysis**

The following variables were evaluated at baseline of OCTAVE Induction 1 and 2: albumin (g/dL) (continuous [per unit];  $\leq 3.5$  vs  $> 3.5$  [remission at week 52 analysis] or  $< 3.5$  vs  $\geq 3.5$  [loss of response during OCTAVE Sustain analysis]), C-reactive protein (CRP; mg/L) (continuous [per unit];  $\leq 3$  vs  $> 3$ ;  $\leq 6$  vs  $> 6$ ), disease duration ( $< 6$  vs  $\geq 6$  years), endoscopic subscore (2 vs 3), extent of disease, presence of extraintestinal manifestations (EIMs), prior TNFi exposure, prior TNFi failure, rectal bleeding subscore, stool frequency subscore, Physician Global Assessment subscore, and total Mayo score (per 1-point).

The following variables were evaluated at baseline of OCTAVE Sustain: age (continuous [per 10-years];  $< 30$  vs  $\geq 50$ ;  $30 - < 40$  vs  $\geq 50$ ;  $40 - < 50$  vs  $\geq 50$ ;  $< 65$  vs  $\geq 65$ ), CRP (mg/L) (continuous [per unit];  $\leq 3$  vs  $> 3$ ;  $\leq 6$  vs  $> 6$ ), gender, oral corticosteroid use, endoscopic improvement (defined as a Mayo endoscopic subscore of 0 or 1 and referred to as mucosal healing in the original OCTAVE protocols [Sandborn WJ, Su C, Sands BE, et al. Tofacitinib as induction and maintenance therapy for ulcerative colitis. *N Engl J Med*. 2017;376:1723–36]) from baseline to week 8 of OCTAVE Induction 1 and 2, presence of EIMs, race, remission status, partial Mayo score ( $< 2$  vs  $\geq 2$ ), and total Mayo score ( $< 3$  vs  $\geq 3$ ).

Tofacitinib dose received during OCTAVE Sustain was also evaluated (tofacitinib 10 mg twice daily vs placebo; tofacitinib 5 mg twice daily vs placebo).

**SUPPLEMENTARY TABLE 1.** Univariate Logistic Regression Analysis For Factors Associated With Remission at Week 52 of OCTAVE Sustain Among All Patients With Non-Missing Efficacy Values in OCTAVE Sustain

|                                                             | <b>OR (95% CI)</b> | <b>P value</b>       |
|-------------------------------------------------------------|--------------------|----------------------|
| Treatment <sup>†</sup>                                      |                    | <0.0001 <sup>‡</sup> |
| Tofacitinib 10 mg BID vs placebo                            | 5.83 (3.38–10.05)  |                      |
| Tofacitinib 5 mg BID vs placebo                             | 4.07 (2.36–7.02)   |                      |
| Endoscopic subscore (2 vs 3) <sup>†</sup>                   | 1.50 (1.03–2.18)   | 0.0354               |
| Total Mayo score (<3 vs ≥3) <sup>*</sup>                    | 1.74 (1.19–2.54)   | 0.0046               |
| Partial Mayo score (<2 vs ≥2) <sup>*</sup>                  | 2.09 (1.43–3.05)   | 0.0001               |
| Remission status (yes vs no) <sup>*</sup>                   | 1.64 (1.11–2.43)   | 0.0135               |
| Extent of disease <sup>‡</sup>                              |                    | 0.0219 <sup>‡</sup>  |
| Left-sided colitis vs extensive colitis/pancolitis          | 1.29 (0.85–1.96)   |                      |
| Proctosigmoiditis/proctitis vs extensive colitis/pancolitis | 2.11 (1.24–3.58)   |                      |
| CRP (mg/L) <sup>*</sup>                                     |                    |                      |
| CRP (per unit)                                              | 0.93 (0.88–0.99)   | 0.0140               |
| CRP (≤3 vs >3 mg/L)                                         | 2.00 (1.23–3.25)   | 0.0053               |
| CRP (≤6 vs >6 mg/L)                                         | 2.51 (1.23–5.13)   | 0.0116               |
| Oral corticosteroid use (yes vs no) <sup>*</sup>            | 0.62 (0.42–0.90)   | 0.0121               |

Remission was defined as a total Mayo score of ≤2 with no individual subscore >1, and a rectal bleeding subscore of 0. The following factors were not significant ( $P > 0.05$ ): albumin (g/dL) (continuous [per unit]; ≤3.5 vs >3.5), CRP (mg/L) (continuous [per unit]; ≤3 vs >3; ≤6 vs >6), disease duration (<6 vs ≥6 years), presence of EIM, prior TNFi exposure, prior TNFi failure, rectal bleeding subscore, stool frequency subscore, PGA subscore, total Mayo score (all at baseline of OCTAVE Induction 1 and 2); age (continuous [per 10-years]; <30 vs

≥50; 30–<40 vs ≥50; 40–<50 vs ≥50; <65 vs ≥65 years), gender, race (Asian vs other; Black vs other; White vs other), endoscopic improvement and presence of EIM (all at baseline of OCTAVE Sustain).

\*Data at baseline of OCTAVE Sustain.

†Data at baseline of OCTAVE Induction 1 and 2.

‡Overall effect.

BID, twice daily; CI, confidence interval; CRP, C-reactive protein; EIM, extraintestinal manifestation; NA, not applicable; OR, odds ratio; PGA, Physician Global Assessment; TNFi, tumor necrosis factor inhibitor.

**SUPPLEMENTARY TABLE 2.** Univariate Logistic Regression Analysis For Factors Associated With Remission at Week 52 of OCTAVE Sustain Among All Patients With Non-Missing Efficacy Values Who Received Tofacitinib 5 mg BID in OCTAVE Sustain

|                                        | <b>OR (95% CI)</b> | <b>P value</b> |
|----------------------------------------|--------------------|----------------|
| Total Mayo score (<3 vs ≥3)*           | 2.37 (1.25–4.48)   | 0.0082         |
| Partial Mayo score (<2 vs ≥2)*         | 2.41 (1.29–4.53)   | 0.0061         |
| Remission status (yes vs no)*          | 2.06 (1.08–3.93)   | 0.0288         |
| Oral corticosteroid use (yes vs no)*   | 0.51 (0.27–0.95)   | 0.0333         |
| Albumin (g/dL; per unit)†              | 2.41 (1.10–5.30)   | 0.0286         |
| Prior TNFi failure status (yes vs no)† | 0.48 (0.25–0.92)   | 0.0268         |

Remission was defined as a total Mayo score of ≤2 with no individual subscore >1, and a rectal bleeding subscore of 0. The following factors were not significant ( $P > 0.05$ ): albumin (g/dL) (≤3.5 vs >3.5), CRP (mg/L) (continuous [per unit]; ≤3 vs >3; ≤6 vs >6), disease duration (<6 vs ≥6 years), endoscopic subscore (2 vs 3), extent of disease, presence of EIM, prior TNFi exposure, rectal bleeding subscore, stool frequency subscore, PGA subscore, total Mayo score (all at baseline of OCTAVE Induction 1 and 2); age (continuous [per 10-years]; <30 vs ≥50; 30–<40 vs ≥50; 40–<50 vs ≥50; <65 vs ≥65 years), CRP (mg/L) (continuous [per unit]; ≤3 vs >3; ≤6 vs >6), gender, race (Asian vs other; Black vs other; White vs other), endoscopic improvement and presence of EIM (all at baseline of OCTAVE Sustain).

\*Data at baseline of OCTAVE Sustain.

†Data at baseline of OCTAVE Induction 1 and 2.

BID, twice daily; CI, confidence interval; CRP, C-reactive protein; EIM, extraintestinal manifestation; OR, odds ratio; PGA, Physician Global Assessment; TNFi, tumor necrosis factor inhibitor.

**SUPPLEMENTARY TABLE 3.** Univariate Logistic Regression Analysis For Factors Associated With Remission at Week 52 of OCTAVE Sustain Among All Patients With Non-Missing Efficacy Values Who Received Tofacitinib 10 mg BID in OCTAVE Sustain

|                                      | <b>OR (95% CI)</b> | <b>P value</b> |
|--------------------------------------|--------------------|----------------|
| Total Mayo score (<3 vs ≥3)*         | 2.45 (1.25–4.79)   | 0.0087         |
| Partial Mayo score (<2 vs ≥2)*       | 2.65 (1.41–4.99)   | 0.0025         |
| Remission status (yes vs no)*        | 2.28 (1.15–4.55)   | 0.0188         |
| Oral corticosteroid use (yes vs no)* | 0.51 (0.27–0.97)   | 0.0408         |
| Endoscopic improvement (yes vs no)*  | 2.05 (1.10–3.83)   | 0.0246         |
| CRP (mg/L)*                          |                    |                |
| CRP (per unit)                       | 0.91 (0.84–0.99)   | 0.0244         |
| CRP (≤3 vs >3 mg/L)                  | 3.80 (1.66–8.74)   | 0.0016         |
| CRP (≤6 vs >6 mg/L)                  | 4.54 (1.45–14.24)  | 0.0096         |
| Age (per 10-years)*                  | 1.30 (1.04–1.63)   | 0.0233         |
| Age (categorical)*,†                 |                    | 0.0089‡        |
| Age (30–<40 vs ≥50 years)            | 0.35 (0.16–0.81)   | 0.0142         |
| Age (40–<50 vs ≥50 years)            | 0.22 (0.09–0.56)   | 0.0014         |

Remission was defined as a total Mayo score ≤2 with no individual subscore >1, and a rectal bleeding subscore of 0. The following factors were not significant ( $P > 0.05$ ): albumin (g/dL) (continuous [per unit]; ≤3.5 vs >3.5), CRP (mg/L) (continuous [per unit]; ≤3 vs >3; ≤6 vs >6), disease duration (<6 vs ≥6 years), endoscopic subscore (2 vs 3), extent of disease, presence of EIM, prior TNFi exposure, prior TNFi failure, rectal bleeding subscore, stool frequency subscore, PGA subscore, total Mayo score (all at baseline of OCTAVE Induction 1 and 2); age (<65 vs ≥65 years), gender, race (Asian vs other; Black vs other; White vs other), and presence of EIM (all at baseline of OCTAVE Sustain).

\*Data at baseline of OCTAVE Sustain.



†Age (<30 vs ≥50) was not significant (OR, 0.46; 95% CI, 0.18–1.13; *P* = 0.0910).

‡Overall effect.

BID, twice daily; CI, confidence interval; CRP, C-reactive protein; EIM, extraintestinal manifestation; OR, odds ratio; PGA, Physician Global Assessment; TNFi, tumor necrosis factor inhibitor.

**SUPPLEMENTARY TABLE 4.** Univariate Cox Proportional Hazards Regression Analysis For Factors Associated With Time to Loss of Response During OCTAVE Sustain Among All Patients With Non-Missing Efficacy Values in OCTAVE Sustain

|                                                           | <b>HR (95% CI)</b> | <b>P value</b> |
|-----------------------------------------------------------|--------------------|----------------|
| Treatment group*                                          |                    |                |
| Tofacitinib 10 mg BID vs placebo                          | 0.29 (0.22–0.40)   | <0.0001        |
| Tofacitinib 5 mg BID vs placebo                           | 0.40 (0.30–0.53)   | <0.0001        |
| Albumin (g/dL; per unit)†                                 | 0.75 (0.56–0.99)   | 0.0443         |
| PGA subscore‡                                             |                    | 0.0077‡        |
| 1 vs 3                                                    | 1.27 (0.71–2.28)   | 0.4222         |
| 2 vs 3                                                    | 0.70 (0.54–0.91)   | 0.0085         |
| Total Mayo score (per 1-point)†                           | 1.12 (1.03–1.22)   | 0.0091         |
| Partial Mayo score (<2 vs ≥2)*                            | 0.67 (0.52–0.85)   | 0.0012         |
| Age (per 10-years)*                                       | 0.88 (0.81–0.96)   | 0.0043         |
| Age (categorical)*‡                                       |                    | 0.0375§        |
| Age (<30 vs ≥50 years)                                    | 1.63 (1.17–2.28)   | 0.0042         |
| EIMs at baseline of OCTAVE Induction 1 and 2 (yes vs no)† | 1.33 (1.03–1.73)   | 0.0283         |
| EIMs at baseline of OCTAVE Sustain (yes vs no)*           | 1.59 (1.11–2.30)   | 0.0122         |
| CRP (mg/L) (≤6 vs >6 mg/L)†                               | 0.72 (0.57–0.92)   | 0.0084         |
| CRP (mg/L)*                                               |                    |                |
| CRP (per unit)                                            | 1.02 (1.01–1.04)   | 0.0005         |
| CRP (≤3 vs >3 mg/L)                                       | 0.68 (0.53–0.89)   | 0.0045         |
| CRP (≤6 vs >6 mg/L)                                       | 0.59 (0.43–0.82)   | 0.0013         |

Oral corticosteroid use (yes vs no)\* 2.08 (1.63–2.66) <0.0001

---

Loss of response was defined by an increase in partial Mayo score of  $\geq 2$  points from baseline in OCTAVE Sustain for two consecutive visits (at least 2 weeks apart), with an increase in rectal bleeding subscore of  $\geq 1$  from baseline of OCTAVE Sustain. The following factors were not significant ( $P > 0.05$ ): albumin (g/dL) (continuous [per unit];  $<3.5$  vs  $\geq 3.5$ ), CRP (mg/L) (continuous [per unit];  $\leq 3$  vs  $>3$ ), disease duration ( $<6$  vs  $\geq 6$  years), endoscopic subscore, extent of disease, rectal bleeding subscore, stool frequency subscore, prior TNFi exposure (yes vs no), prior TNFi failure (yes vs no), (all at baseline of OCTAVE Induction 1 and 2); age ( $<65$  vs  $\geq 65$  years), gender, race (Asian vs other; Black vs other; White vs other), endoscopic improvement, remission status at baseline (yes vs no), and total Mayo score ( $<3$  vs  $\geq 3$ ) (all at baseline of OCTAVE Sustain).

\*Data at baseline of OCTAVE Sustain.

†Data at baseline of OCTAVE Induction 1 and 2.

‡Age (30– $<40$  vs  $\geq 50$  years; OR, 1.35; 95% CI, 0.98–1.87;  $P = 0.0666$ ) and (40– $<50$  vs  $\geq 50$  years; OR, 1.28; 95% CI, 0.91–1.80;  $P = 0.1618$ ) were not significant.

§Overall effect.

BID, twice daily; CI, confidence interval; CRP, C-reactive protein; EIM, extraintestinal manifestation; HR, hazard ratio; PGA, Physician Global Assessment; TNFi, tumor necrosis factor inhibitor.

**SUPPLEMENTARY TABLE 5.** Univariate Cox Proportional Hazards Regression Analysis For Factors Associated With Time to Loss of Response During OCTAVE Sustain Among All Patients With Non-Missing Efficacy Values Who Received Tofacitinib 5 mg BID in OCTAVE Sustain

|                                                           | <b>HR (95% CI)</b> | <b>P value</b>      |
|-----------------------------------------------------------|--------------------|---------------------|
| Total Mayo score (<3 vs ≥3)*                              | 0.57 (0.35–0.95)   | 0.0302              |
| Partial Mayo score (<2 vs ≥2)*                            | 0.56 (0.35–0.89)   | 0.0150              |
| EIMs at baseline of OCTAVE Induction 1 and 2 (yes vs no)* | 1.73 (1.08–2.75)   | 0.0223              |
| EIMs at baseline of OCTAVE Sustain (yes vs no)*           | 2.74 (1.50–4.99)   | 0.0010              |
| CRP (mg/L; per unit)*                                     | 1.05 (1.00–1.11)   | 0.0413              |
| Oral corticosteroid use (yes vs no)*                      | 2.77 (1.68–4.55)   | <0.0001             |
| Albumin (g/dL) <sup>†</sup>                               |                    |                     |
| Albumin (per unit)                                        | 0.52 (0.33–0.83)   | 0.0058              |
| Albumin (<3.5 vs ≥3.5 g/dL)                               | 2.86 (1.15–7.09)   | 0.0235              |
| PGA subscore <sup>†</sup>                                 |                    | 0.0035 <sup>‡</sup> |
| 1 vs 3                                                    | 1.29 (0.50–3.34)   | 0.6056              |
| 2 vs 3                                                    | 0.48 (0.30–0.78)   | 0.0027              |

Loss of response was defined by an increase in partial Mayo score of ≥2 points from baseline in OCTAVE Sustain for two consecutive visits (at least 2 weeks apart), with an increase in rectal bleeding subscore of ≥1 from baseline of OCTAVE Sustain. The following factors were not significant ( $P > 0.05$ ): CRP (mg/L) (continuous [per unit]; ≤3 vs >3; ≤6 vs >6), disease duration (<6 vs ≥6 years), endoscopic subscore, extent of disease, rectal bleeding subscore, stool frequency subscore, prior TNFi exposure (yes vs no), prior TNFi failure (yes vs no), total Mayo score (all at baseline of OCTAVE Induction 1 and 2); age (continuous [per 10-years]; <30 vs ≥50; 30–<40 vs ≥50; 40–<50 vs ≥50; <65 vs ≥65 years), CRP (mg/L)

( $\leq 3$  vs  $> 3$ ;  $\leq 6$  vs  $> 6$ ), gender, race (Asian vs other; Black vs other; White vs other), endoscopic improvement, remission status at baseline (yes vs no) (all at baseline of OCTAVE Sustain).

\*Data at baseline of OCTAVE Sustain.

†Data at baseline of OCTAVE Induction 1 and 2.

‡Overall effect.

BID, twice daily; CI, confidence interval; CRP, C-reactive protein; EIM, extraintestinal manifestation; HR, hazard ratio; PGA, Physician Global Assessment; TNFi, tumor necrosis factor inhibitor.

**SUPPLEMENTARY TABLE 6.** Univariate Cox Proportional Hazards Regression Analysis For Factors Associated With Time to Loss of Response During OCTAVE Sustain Among All Patients With Non-Missing Efficacy Values Who Received Tofacitinib 10 mg BID in OCTAVE Sustain

|                                      | <b>HR (95% CI)</b> | <b>P value</b> |
|--------------------------------------|--------------------|----------------|
| Partial Mayo score (<2 vs ≥2)*       | 0.53 (0.31–0.92)   | 0.0235         |
| Age (per 10-years)*                  | 0.70 (0.57–0.86)   | 0.0006         |
| Age (categorical)*                   |                    | 0.0109†        |
| Age (<30 vs ≥50 years)               | 3.73 (1.58–8.80)   | 0.0026         |
| Age (30-<40 vs ≥50 years)            | 3.60 (1.60–8.08)   | 0.0019         |
| Age (40-<50 vs ≥50 years)            | 2.58 (1.07–6.23)   | 0.0349         |
| CRP (mg/L)*                          |                    |                |
| CRP (per unit)                       | 1.03 (1.01–1.05)   | 0.0067         |
| CRP (≤3 vs >3 mg/L)                  | 0.50 (0.29–0.85)   | 0.0112         |
| CRP (≤6 vs >6 mg/L)                  | 0.43 (0.23–0.78)   | 0.0058         |
| Oral corticosteroid use (yes vs no)* | 3.28 (1.89–5.68)   | <0.0001        |

Loss of response was defined by an increase in partial Mayo score of ≥2 points from baseline in OCTAVE Sustain for two consecutive visits (at least 2 weeks apart), with an increase in rectal bleeding subscore of ≥1 from baseline of OCTAVE Sustain. The following factors were not significant ( $P > 0.05$ ): albumin (g/dL) (continuous [per unit]; <3.5 vs ≥3.5), C-reactive protein (CRP; mg/L) (continuous [per unit]; ≤3 vs >3; ≤6 vs >6), disease duration (<6 vs ≥6 years), presence of EIM, endoscopic subscore, extent of disease, PGA subscore, rectal bleeding subscore, prior TNFi exposure (yes vs no), prior TNFi failure (yes vs no), total Mayo score, stool frequency subscore (0 vs 3; 1 vs 3; 2 vs 3) (all at baseline of OCTAVE Induction 1 and 2); age (<65 vs ≥65 years), gender, race (Asian vs other; White vs other), presence of EIM, endoscopic improvement, remission status at baseline (yes vs no), and total Mayo score (<3 vs ≥3) (all at baseline of OCTAVE Sustain).

\*Data at baseline of OCTAVE Sustain.

†Overall effect.

BID, twice daily; CI, confidence interval; CRP, C-reactive protein; EIM, extraintestinal manifestation; HR, hazard ratio; PGA, Physician Global Assessment; TNFi, tumor necrosis factor inhibitor.

**SUPPLEMENTARY TABLE 7.** Summary of Safety, AEs of Special Interest, and Laboratory Value Changes, By Week 52 Remission Status and

Treatment Group

|                                                | <b>Tofacitinib 5 mg BID</b> |                             | <b>Tofacitinib 10 mg BID</b> |                            | <b>Placebo</b>              |                             |
|------------------------------------------------|-----------------------------|-----------------------------|------------------------------|----------------------------|-----------------------------|-----------------------------|
|                                                | <b>Yes</b><br><b>N = 68</b> | <b>No</b><br><b>N = 101</b> | <b>Yes</b><br><b>N = 80</b>  | <b>No</b><br><b>N = 83</b> | <b>Yes</b><br><b>N = 22</b> | <b>No</b><br><b>N = 133</b> |
| <b>Remission achieved at week 52</b>           |                             |                             |                              |                            |                             |                             |
| <b>Safety and AEs of special interest</b>      |                             |                             |                              |                            |                             |                             |
| AEs, n (%)                                     | 45 (66.2)                   | 76 (75.3)                   | 67 (83.8)                    | 64 (77.1)                  | 14 (63.6)                   | 98 (73.7)                   |
| AEs leading to discontinuation, n (%)          | 1 (1.5)                     | 11 (10.9)                   | 0 (0.0)                      | 6 (7.2)                    | 0 (0.0)                     | 23 (17.3)                   |
| Serious AEs, n (%)                             | 3 (4.4)                     | 4 (4.0)                     | 3 (3.8)                      | 1 (1.2)                    | 0 (0.0)                     | 4 (3.0)                     |
| Infections (all), n (%)                        | 26 (38.2)                   | 38 (37.6)                   | 41 (51.3)                    | 26 (31.3)                  | 9 (40.9)                    | 28 (21.1)                   |
| Herpes zoster (non-serious and serious), n (%) | 1 (1.5)                     | 2 (2.0)                     | 5 (6.3)                      | 4 (4.8)                    | 0 (0.0)                     | 1 (0.8)                     |
| <b>Laboratory value changes</b>                |                             |                             |                              |                            |                             |                             |
| Total cholesterol >1.3× ULN                    | 27 (39.7)                   | 19 (18.8)                   | 26 (32.5)                    | 14 (16.9)                  | 2 (9.1)                     | 10 (7.5)                    |
| Triglycerides >1.3× ULN                        | 3 (4.4)                     | 4 (4.0)                     | 12 (15.0)                    | 2 (2.4)                    | 1 (4.5)                     | 5 (3.8)                     |
| LDL >1.2× ULN                                  | 27 (39.7)                   | 26 (25.7)                   | 33 (41.3)                    | 16 (19.3)                  | 4 (18.2)                    | 22 (16.5)                   |



|               |           |           |           |           |         |          |
|---------------|-----------|-----------|-----------|-----------|---------|----------|
| HDL <0.8× LLN | 4 (5.9)   | 3 (3.0)   | 2 (2.5)   | 1 (1.2)   | 0 (0.0) | 9 (6.8)  |
| CK >2× ULN    | 17 (25.0) | 18 (17.8) | 32 (40.0) | 19 (22.9) | 1 (4.5) | 11 (8.3) |

---

Remission was defined as a total Mayo score  $\leq 2$  with no individual subscore  $> 1$ , and a rectal bleeding subscore of 0.

AE, adverse event; BID, twice daily; CK, creatine kinase; HDL, high-density lipoprotein; LDL, low-density lipoprotein; LLN, lower limit of normal; N, number of patients in the specified category with non-missing data; n, number of patients with the specified safety event; ULN, upper limit of normal.
